# Supplementary material
Source: HighWire-hosted journal article supplement (https://emj.bmj.com/highwire/filestream/157289/field_highwire_adjunct_files/0/248567revision3.xls)
Supplement: 248567revision3.xls [file 248567revision3.xls]

## Sheet: Sheet1
Paediatric Drug and Infusion Calculator - St Johns Hospital, Livingston.			Actual weight in kgs=
For use in children over 1 month - If age < 1 then enter weight not age			OR Age in years (1-12)=		5			FALSE
ENTER KNOWN WEIGHT OR AGE IN ONE OF THE YELLOW BOXES, CLEAR OTHER BOX AND CLICK HERE			Weight used for calculation		18		kg	FALSE
Electrical Cardiversion	Indication	Joules		Calculated Joules
Biphasic or Monophasic	VF or Pulseless VT (Cardiac arrest)	4	Joules/kg all shocks	100	Joules
Monophasic / Biphasic	Synchronous Cardioversion	0.5	Joules/kg first dose	10	Joules
Monophasic / Biphasic	Synchronous Cardioversion	1	Joules/kg second dose	20	Joules
Monophasic / Biphasic	Synchronous Cardioversion	2	Joules/kg third dose	50	Joules
ETT tube	Only calculates if age entered		Estimated Internal diameter	5.25	mms
ETT tube	Only calculates if age entered		Estimated Length	13.25	cms
Resuscitation Fluid Bolus	Shock	20	mls/kg	360	ml
Maintenance Fluid Requirement	4mls/kg/hr for first 10kg, 2mls/kg/hr for second 10kg, 1mls/kg/hr thereafter			56	mls/hr
Suction catheter size				8	French
Resuscitation Drugs	Dilution	Recommended dose per kg		Actual dose
Adrenaline 1:10,000 IV bolus	none	0.01	mg/kg	1.8	mls	0.18	mgs
Atropine (600mcgs/ml)	none (600mcgs/mls)	0.02	mg/kg (maximum 600mcg)	0.6	mls	0.36	mgs
Atropine (minijet = 100mcgs/ml)	none (100mcgs/mls)	0.02	mg/kg (maximum 600mcg)	3.6	mls	0.36	mgs
Calcium Chloride (10%=minijet)	bolus in emergency else dilute in NS or 5D	0.25	mls/kg (max 4.5mmols=6.6mls)	4.5		mls
Sodium bicarbonate (8.4%)	Resuscitation or metabolic acidosis	1	ml/kg (eq to 1 mmol/kg of 8.4%)	18		mls
Amiodarone	IV loading dose	5	mg/kg (max 300mg)	90		mg
Naloxone (minijet = 400mcgs/ml)	no reconstitution required (400mcgs/ml)	0.01	mg/kg	0.45	ml	0.18	mg
Glucose / Dextrose (10%)	no reconstitution required	5	mls/kg	90		mls
Adrenaline infusion	0.3 mg/kg (=0.3 mls/kg of 1:1000) in 50mls NS	0.1	micrograms/kg/minute	1		ml/hour
Noradrenaline infusion	0.3 mg/kg (=0.3 mls/kg of 1:1000) in 50mls NS	0.1	micrograms/kg/minute	1		ml/hour
Analgesics	Dilution	Recommended dose per kg		Actual dose
Morphine (10mg/ml)	9mls WFI + 1mls morphine	0.1	mg/kg	1.8	ml	1.8	mg
Intranasal Diamorphine	Dilute with saline to volume of 0.2mls	0.1	mg/kg	0.2	ml	1.8	mg
Paracetamol - ORAL	Initial dose 20mg/kg, Max 90mg/kg per day	20	mg/kg	360			mg
Ibuprofen	Max: 20 mg/kg/day up to 2.4 g/day	5	mg/kg	90			mg
Voltarol PR or ORAL		1	mg/kg	18			mg
Codine phosphate - ORAL		1	mg/kg	18			mg
Anaesthetic Drugs	Dilution	Recommended dose per kg		Actual dose
Thiopentone	500mg powder in 20mls WFI	5	mg/kg	3.6	ml	90	mg
Etomidate 0.2%	preprepared as 2mg / mls (20mg in 10mls)	0.2	mg/kg	1.8	ml	3.6	mg
Propofol 1%	1% solution - 10mg in 1mls	2	mg/kg	3.6	ml	36	mg
Midazolam 0.5%	Usually comes as 5 mg/ml	0.2	mg/kg	0.72	ml	3.6	mg
Fentanyl 0.05%	Usually comes as 500 mcg/ml	0.02	mg/kg	0.72	ml	0.36	mg
Suxamethonium	Usually comes as 50 mg/ml	2	mg/kg	0.72	ml	36	mg
Atracurium	Usually comes as 10 mg/ml	0.5	mg/kg	0.9	ml	9	mg
Vecuronium	10 mg powder in 10mls WFI	0.1	mg/kg	1.8	ml	1.8	mg
Flumazenil - IV bolus over 15 secs	Usually comes as 100 mcg/ml	0.01	mg/kg	1.8	ml	0.18	mg
Ketamine IM	bolus of 10mg/ml solution	2	mg/kg	3.6	ml	36	mg
Ketamine IV	bolus of 10mg/ml solution	1	mg/kg	1.8	ml	18	mg
Other Cardiac Drugs	Dilution	Recommended dose per kg		Actual dose
Ca Gluconate 10%	bolus in emergency else dilute in NS or 5D	0.3	mls/kg of 10% (max 20 mls)	5.4		mls
Magnesium Sulphate 50%	bolus in emergency else dilute in NS or 5D	25	mg/kg (max 2g=4mls=8mmols)	0.9	mls	450	mgs
Flecanide - 1% (10 mg/ml)	SVT - Dilute in 5D - Give over 10-30 mins	2	mg/kg	3.6	mls	36	mg
Verapamil - 0.25% (2.5 mg/ml)	SVT (not under 1 year) - Give over 2-3 mins	0.1	mg/kg (max 5mg)	0.72	mls	1.8	mg
Adenosine - IV bolus	Max: 300mcgs/kg if <1 month, else 500mcgs/kg	0.05	mg/kg			0.9	mg
Alprostadil	50-100 ng/kg/min	50	ng/kg/min	900		ng/min
Frusemide - IV bolus		1	mg/kg			18	mg
Seizure drugs	Dilution	Recommended dose per kg		Actual dose
Diazepam PR		0.5	mg/kg			5	mg
Intranasal or Buccal Midazolam		0.5	mg/kg			5	mg
Lorazepam IV		0.1	mg/kg (max 4mg)			1.8	mg
Diazepam IV / IO		0.3	mg/kg			5.4	mg
Paraldehyde PR	Dilute with equal volume of olive/sunflower oil	0.4	ml/kg	7.2	ml	14.4	total
Phenytoin IV -5% (50 mg/ml)	Loading dose over 30-45 minutes	18	mg/kg	6.48	ml	324	mg
Phenobarbitone IV		20	mg/kg			360	mg
Asthma drugs	Dilution	Recommended dose per kg		Actual dose
Salbutamol nebuliser	2.5 - 5.0 mg					5	mg
Ipratropium bromide nebuliser		0.025	mg/kg	125			mg
Intravenous Salbutamol	Max 50 mgs in 1 ml, IV over 5 mins	15	mcgs/kg	250		mcgs
Intravenous Magnesium SO4 50%		25	mg/kg (max 2g=4mls=8mmols)	0.9	mls	450	mgs
Intravenous Aminophylline	IV Infusion, single loading dose over 20-30 mins	5	mg/kg (max 500mg)	90		mg
Prednislone - ORAL	OD asthma, BD severe croup	1	mg/kg	18		mg
Hydrocortisone - IV	4 mg/kg bolus then 2-4mg/kg qds	4	mg/kg	72		mg
Adrenaline for croup - nebulised	Not diluted, 1 in 1:1000			5		mls
Antibiotics (loading dose)	Dilution	Recommended dose per kg		Actual dose
Amoxycillin - IV	TDS if over 7 days else BD	50	mg/kg	900		mg
Augmentin - IV	TDS if over 7 days else BD	30	mg/kg	540		mg
Ceftriaxone - IV	20-50mg/kg OD, 80mg/kg in severe infections	50	mg/kg (max 4g)	900		mg
Cefotaxime - IV	BD, QDS in meningitis and severe infections	50	mg/kg (max 12g daily)	900		mg
Flucloxacillin - IV	QDS - Max 1g or 2g in severe infection	25	mg/kg	450		mg
Gentamicin - IV		2	mg/kg	36		mg
Activated Charcoal - ORAL	single dose (or 2-12 yrs=25-50g,>12yrs=50g)	1	g/kg	18		grams
Anaphylaxis drugs	Dilution	Recommended dose per kg		Actual dose
Adrenaline 1:1000 IM	Anaphylaxis, no dilution	0.01	mg/kg	0.18	ml	0.18	mg
Chlorpheniramine - IV	Anaphylaxis, no dilution	0.25	mg/kg (if under 1)			10	mg
Other drugs	Dilution	Recommended dose per kg		Actual dose
Desferrioxamine		15	mg/kg/hr	270		mg/hr
Insulin - IV		0.1	units/kg/hour	1.8		units/hour
Lignocaine - IV local anaesthetic		3	mg/kg	54		mg
Mannitol - 10% solution	IV infusion over 30 minutes	0.5	g/kg	90	ml	9	grams
Mannitol - 20% solution	IV infusion over 30 minutes	0.5	g/kg	45	ml	9	grams
WFI = water for injection, NS = Normal Saline, 5D = 5% Dextrose			v.2007.7, designed by Dr Matt Reed 2007
PLEASE CHECK ALL DOSES AND PREPARED DILUTIONS PRIOR TO ADMINISTRATION - THIS CHART IS NOT FAILSAFE!!
